# Supplementary material for: Hydroxychloroquine Inhibits the Trained Innate Immune Response to Interferons
Source: PubMed Central journal article supplement (PMC7762774; doi:10.1016/j.xcrm.2020.100146), 2020-11-10
Supplement: mmc1.pdf [file mmc1.pdf]

**Cell Reports Medicine, Volume 1**

## **Supplemental Information**

### **Hydroxychloroquine Inhibits the Trained**

### **Innate Immune Response to Interferons**

**Nils Rother, Cansu Yanginlar, Rik G.H. Lindeboom, Siroon Bekkering, Mandy M.T. van Leent, Baranca Buijsers, Inge Jonkman, Mark de Graaf, Marijke Baltissen, Lieke A. Lamers, Niels P. Riksen, Zahi A. Fayad, Willem J.M. Mulder, Luuk B. Hilbrands, Leo A.B. Joosten, Mihai G. Netea, Michiel Vermeulen, Johan van der Vlag, and Raphaël Duivenvoorden**

**A**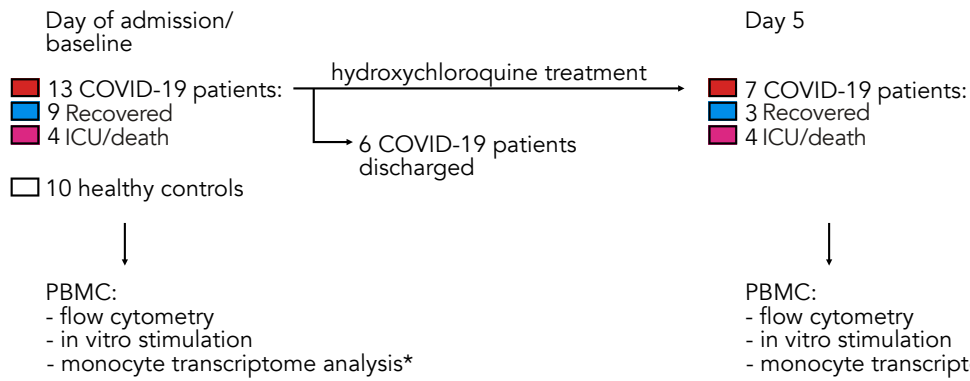**B**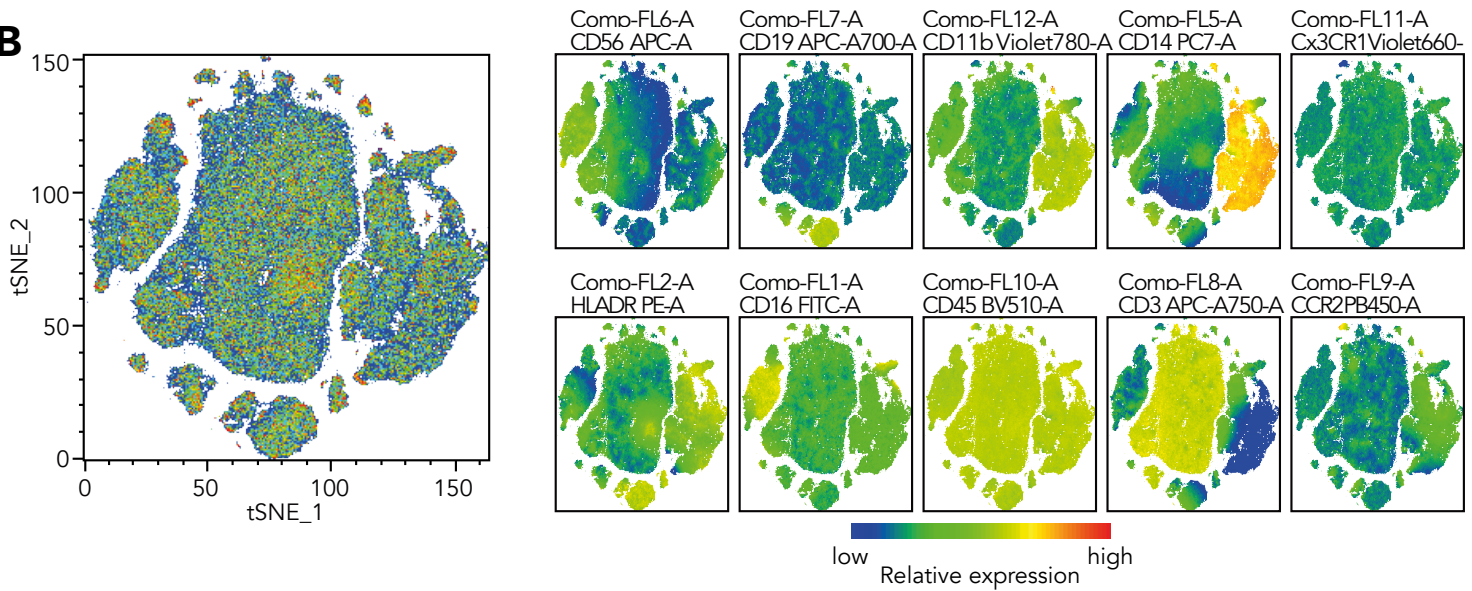**C**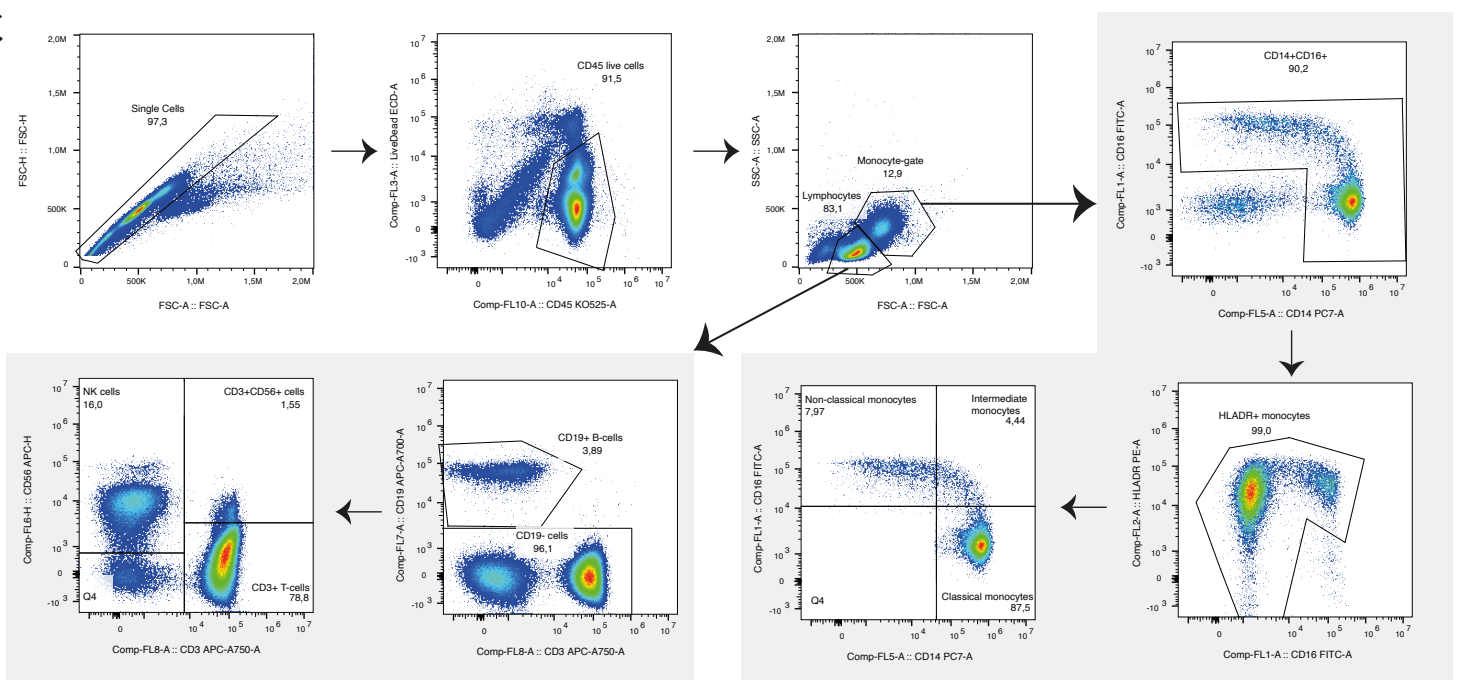**D**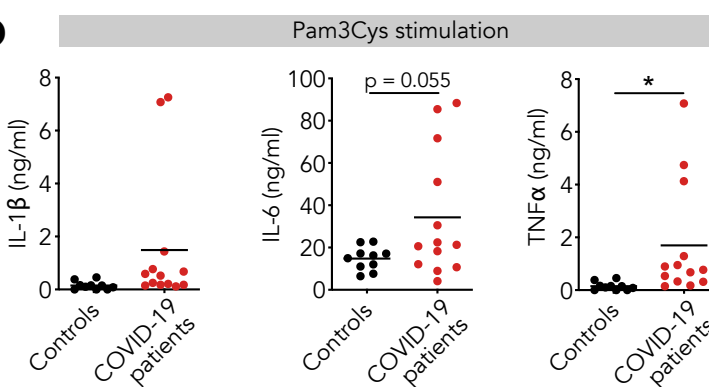**E**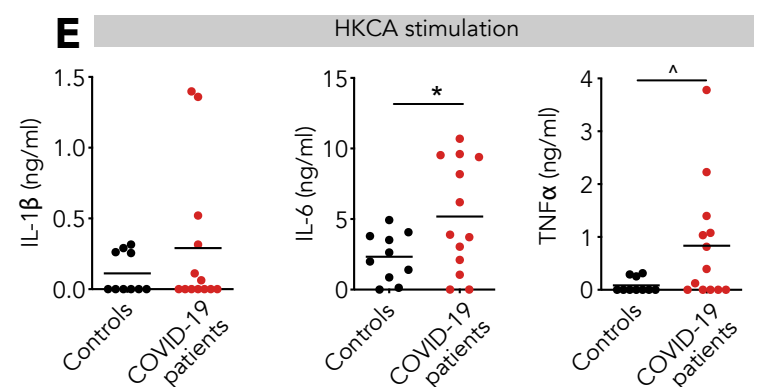

**Supplementary Figure 1: Innate immune response in COVID-19 patients at the time of presentation. Related to Figure 1.**

(A) Schematic representation of study outline involving COVID-19 patients. PBMCs of COVID-19 patients were isolated at admission (n=13) and five days later (n=7). PBMCs were used for flow cytometric analysis and *in vitro* stimulation, healthy control PBMCs (n=10) served as control. \* Monocyte transcriptome analysis was performed for COVID-19 patients.

(B) Flow cytometry marker expression shown in tSNE plots in **Figure 1A** and **Figure 2A**.

(C) Flow cytometry gating strategy for quantifications of lymphocytes, monocytes and marker expression on monocytes.

(D and E) Isolated PBMCs were stimulated with Pam3CSK4 (D) or HKCA (E) for 24 hours after which production of IL-1 $\beta$ , IL-6 and TNF $\alpha$  was quantified in the supernatant using ELISA. COVID-19 patient PBMCs show increased cytokine production upon stimulation with either stimulus (n=13 for COVID-19 patients, n=10 for healthy controls).

Data are presented as mean  $\pm$  SEM.  $^{\wedge}p < 0.06$ ,  $^*p < 0.05$  for two-sided student's t-test (for normally distributed data) or Kruskal-Wallis test.

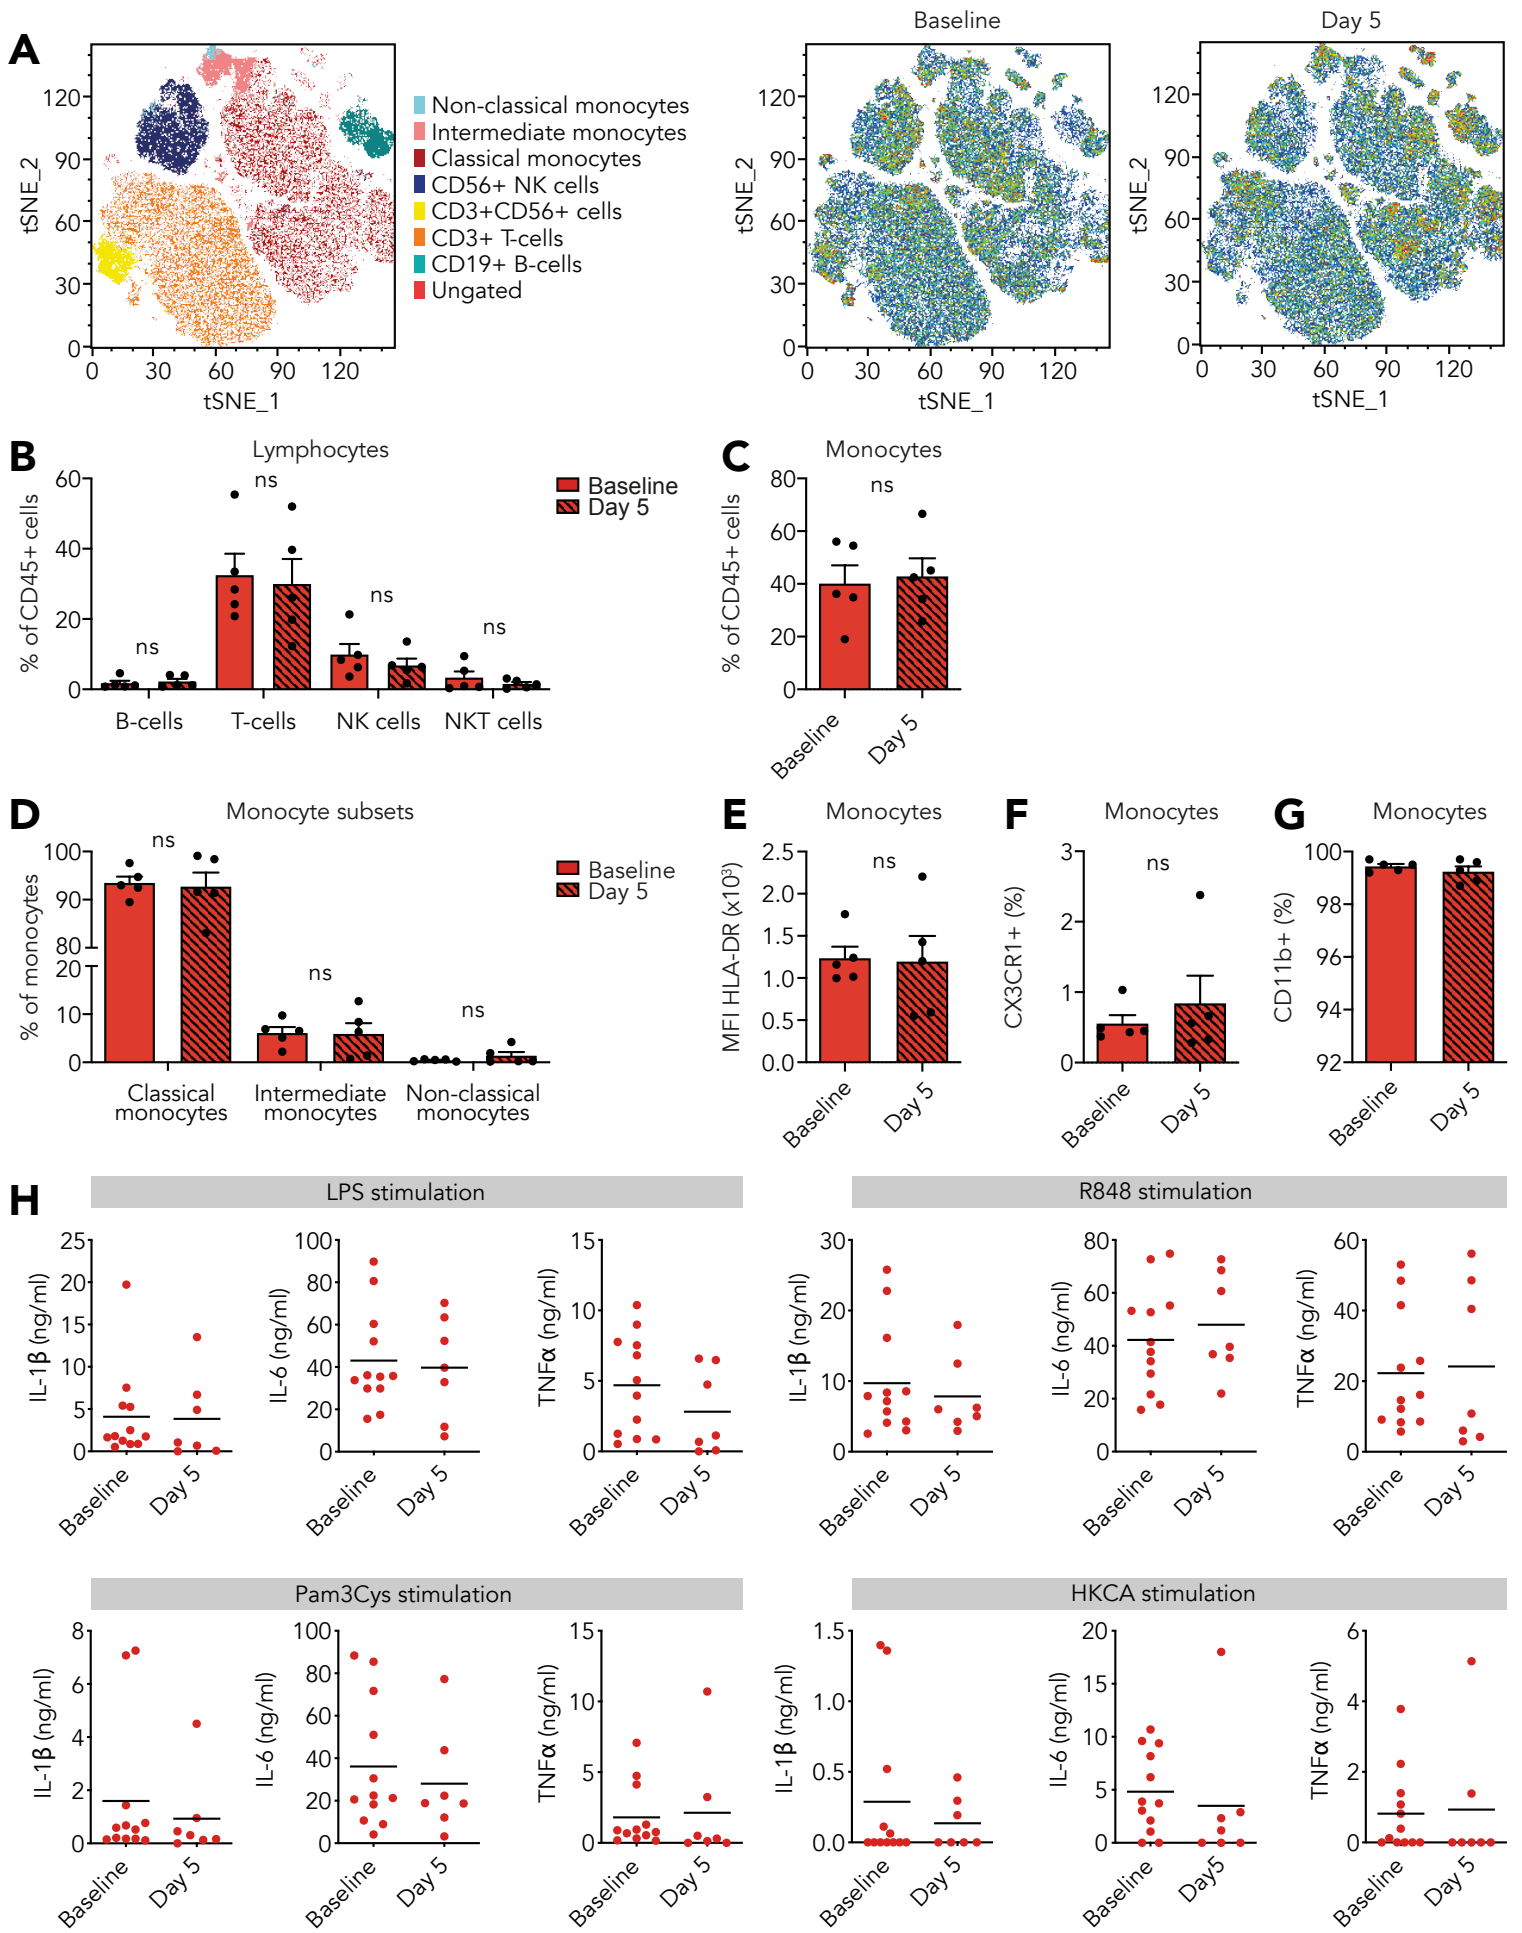

**Supplementary Figure 2: Innate immune response in COVID-19 patients at the time of presentation does not differ with response five days after admission. Related to Figure 2.**

(A-G) PBMCs isolated from COVID-19 patients at admission and five days after admission were analyzed using flow cytometry (n=10 for COVID-19 patients at admission, n=5 for COVID-19 patients five days after admission).

(A) tSNE plots showing unsupervised clustering on the expression of 10 markers (CD45, CD14, CD16, CD3, CD19, CD56, HLA-DR, CD11b, CCR2 and CX3CR1) in COVID-19 patients at admission and five days after admission.

(B) Quantification of lymphocytes using gating strategy shown in **Supplementary Figure 1C** identified no difference between timepoints.

(C and D) Quantification of monocytes showed no difference between COVID-19 patients at admission and five days after admission.

(E-G) Analysis of marker expression of HLA-DR, CX3CR1 and CD11b on monocytes revealed no difference between COVID-19 patients at admission and five days after admission.

(H) Isolated PBMCs were stimulated with LPS, R848, Pam3CSK4 or HKCA for 24 hours after which production of IL-1 $\beta$ , IL-6 and TNF $\alpha$  was quantified in the supernatant using ELISA. COVID-19 patient PBMCs show no difference in cytokine production on different timepoints. (n=12 for COVID-19 patients at baseline, n=7 for COVID-19 patients five days after admission)

Data are presented as mean  $\pm$  SEM.  $^{\wedge}p < 0.06$ ,  $*p < 0.05$  for two-sided student's t-test (for normally distributed data) or Kruskal-Wallis test.

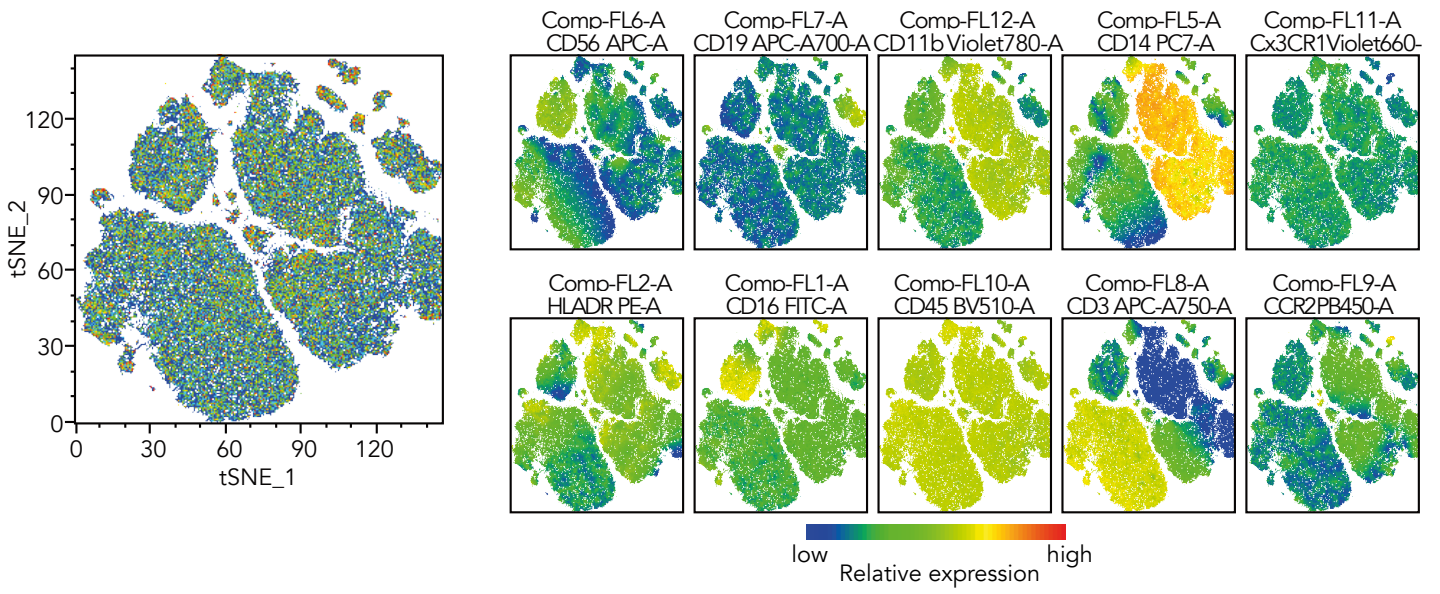

**Supplementary Figure 3: Marker expression of tSNE plots. Related to Figure 3.**

Flow cytometry marker expression shown in tSNE plots in **Figure 3A**.

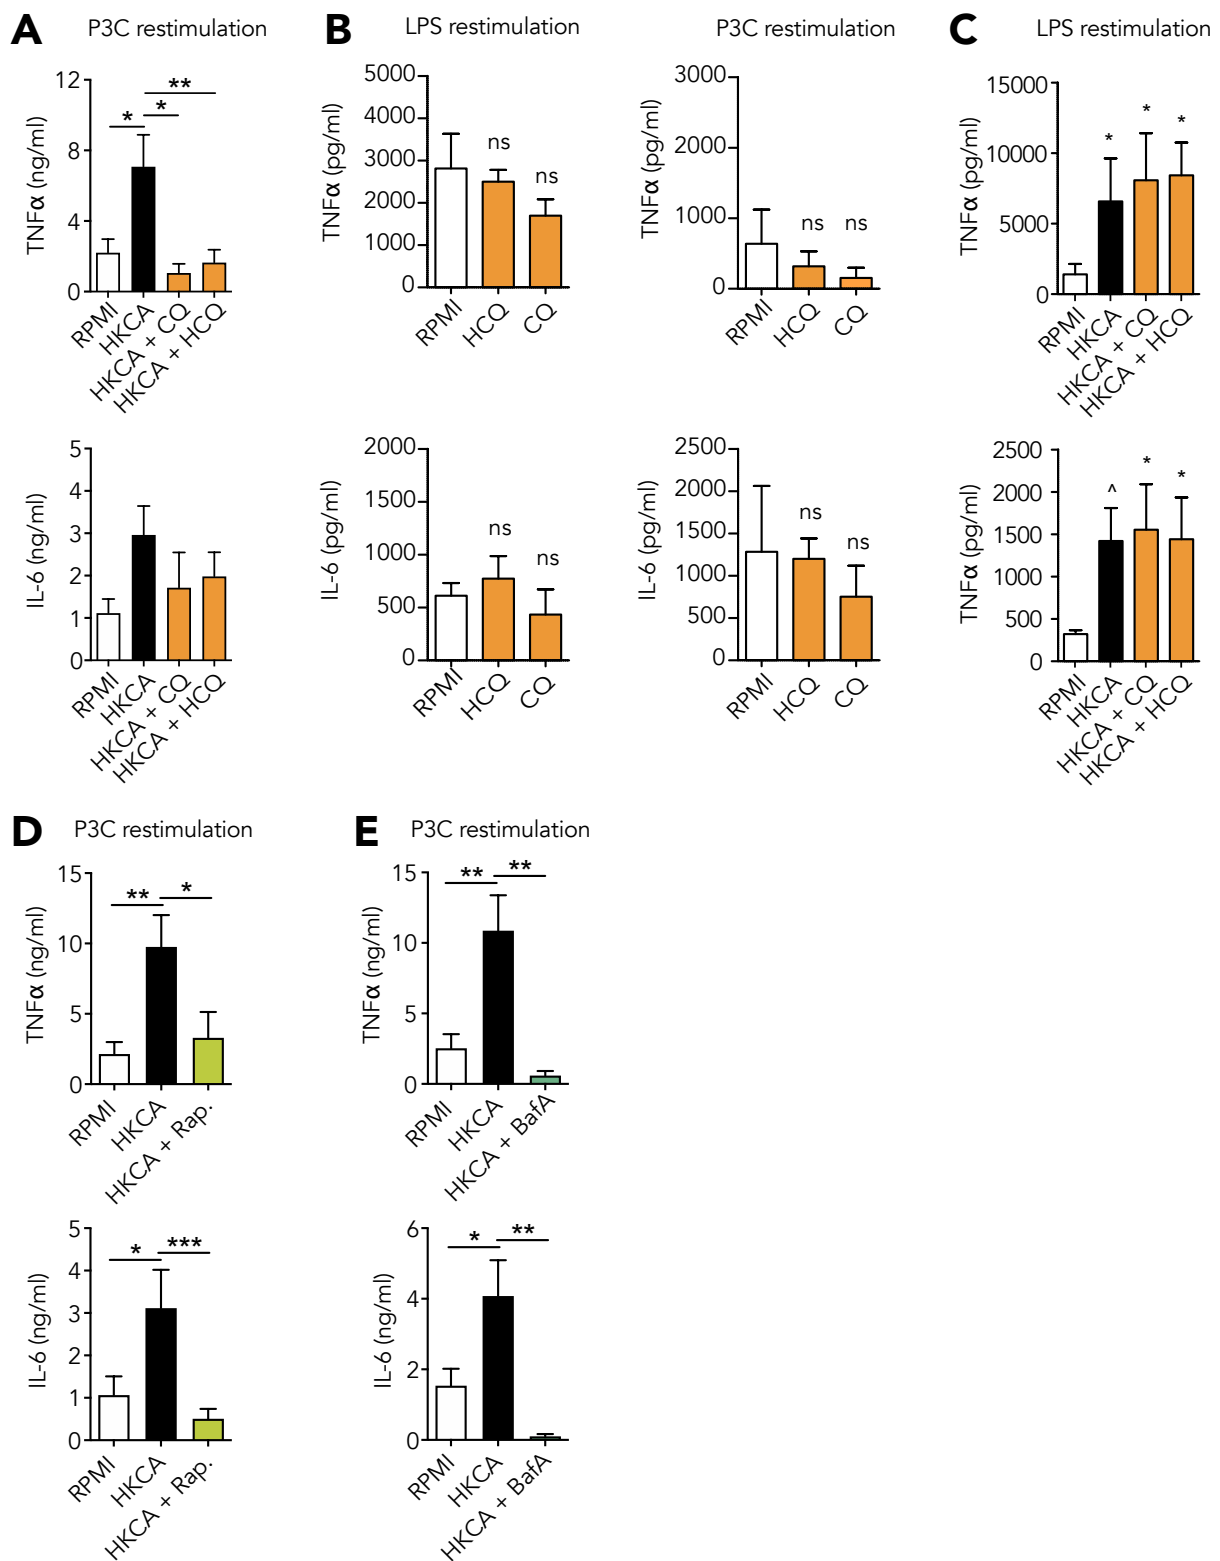

**Supplementary Figure 4: Hydroxychloroquine prevents the induction of trained immunity. Related to Figure 4.**

(A) IL-6 and TNF $\alpha$  production upon restimulation with Pam3CSK4 of HKCA-trained PBMCs treated with HCQ and CQ is abrogated (n=7-17)

(B) HCQ and CQ do not abrogate IL-6 and TNF $\alpha$  production in untrained PBMCs. (n=5)

(C) Hydroxychloroquine and chloroquine were added during restimulation after the resting period instead of during first 24 hours. Both, hydroxychloroquine and chloroquine do not reverse trained immune response when applied during restimulation (n=4, significance compared to RPMI).

(D and E) IL-6 and TNF $\alpha$  production upon restimulation with Pam3CSK4 of HKCA-trained PBMCs can be prevented using rapamycin (D, n=11) and Bafilomycin A (E, n=4-9).

Data are presented as mean  $\pm$  SEM; \*p<0.05, \*\*p<0.01, \*\*\*p<0.001; One-way ANOVA with Dunnett's post-test.



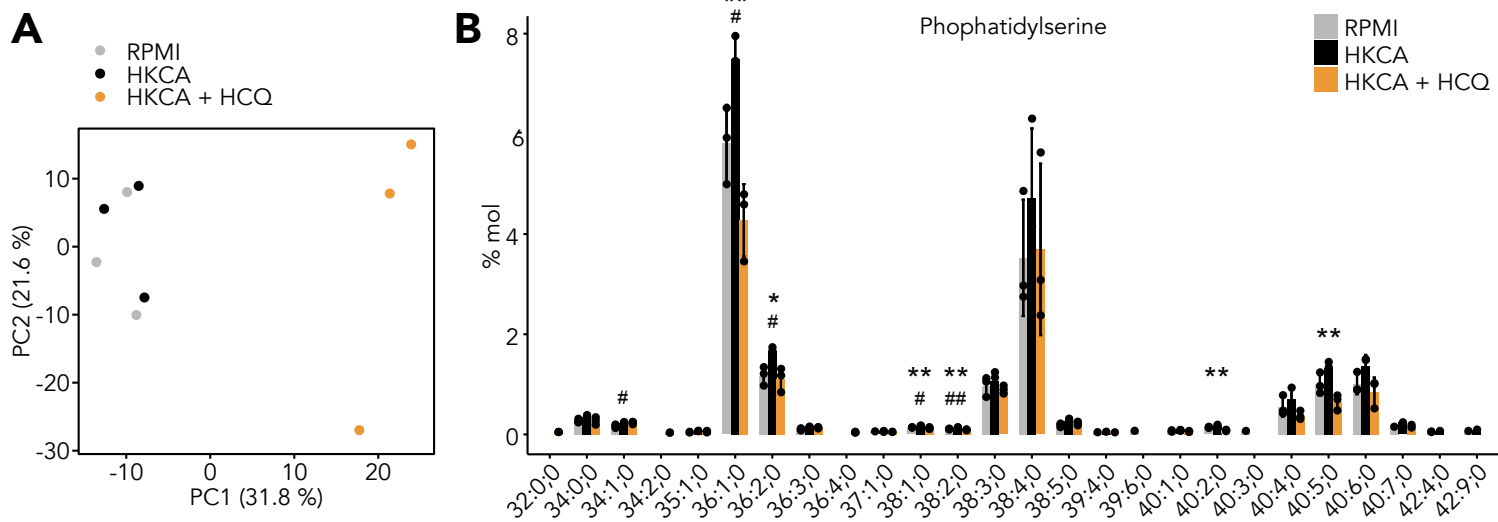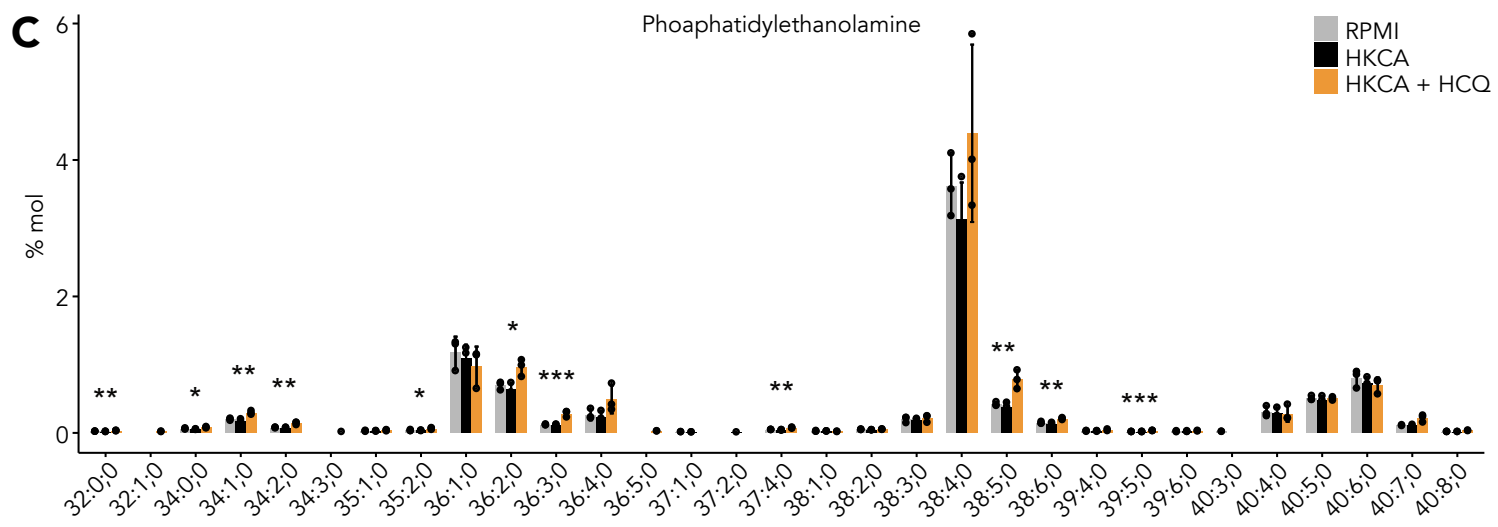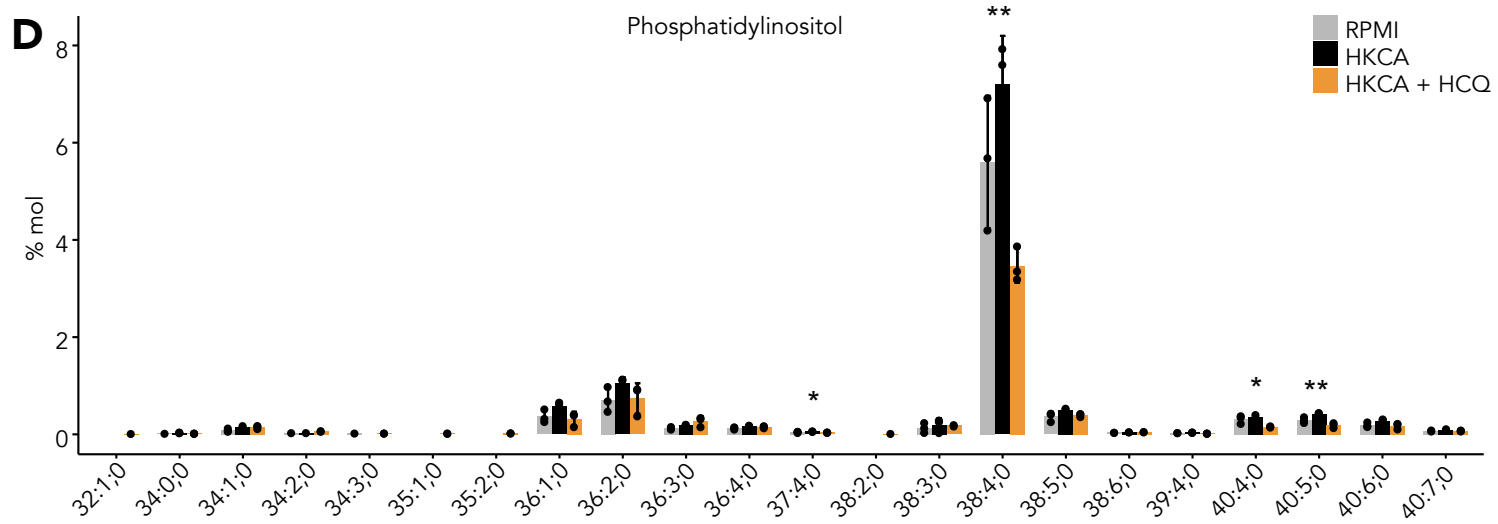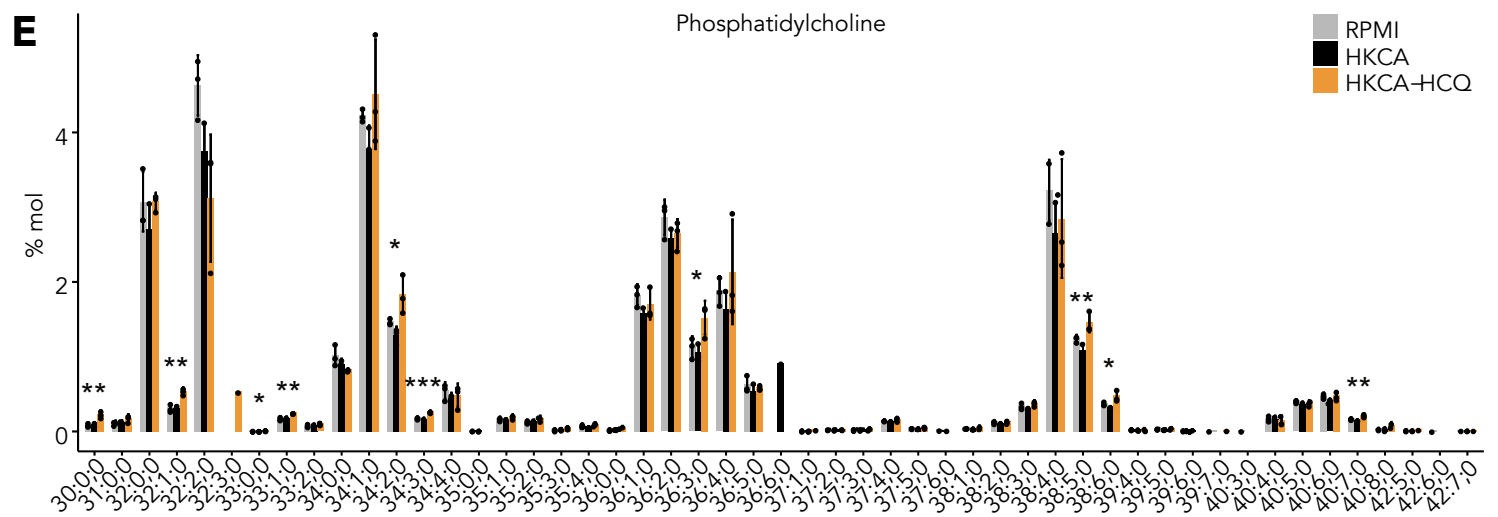



**Supplementary Figure 5: Lipidomic analysis of hydroxychloroquine treated monocytes.  
Related to Figure 5.**

(A-E) PBMCs were stimulated with HKCA, HKCA+HCQ or RPMI as control for 24h. Subsequently monocytes were purified and analyzed for their lipid content using mass spectrometry-based shotgun lipidomics.

(A) PCA plot of all sample replicates. HCQ induces drastic changes in lipid abundance.

(B-E) Abundance of lipid subspecies of phosphatidylserines (B), phosphatidylethanolamines (C), phosphatidylinositols (D) and phosphatidylcholines (E) in control, HKCA-treated and HKCA+HCQ -treated cells are presented as molar percentage of all lipids per treatment group.

N=3 per treatment group. Data are presented as mean  $\pm$  SEM; #p<0.05, ##p<0.01, ###p<0.001 between Control and HKCA; p<0.05, \*\*p<0.01, \*\*\*p<0.001 between HKCA and HKCA+HCQ; One-way ANOVA with Tukey post-test

**Supplementary Table 1:** Demographics and characteristics of COVID-19 patients. Data is the median (inter quartile range) or number (no.) and percentage (%). Related to Figure 1.

| Characteristics at presentation                 | All patients<br>n=13 | Disease outcome  |                    |
|-------------------------------------------------|----------------------|------------------|--------------------|
|                                                 |                      | Recovered<br>n=9 | ICU / Death<br>n=4 |
| Age, years                                      | 68 (54-73)           | 66 (52-73)       | 70 (55-79)         |
| Male, no. (%)                                   | 11 (85%)             | 7 (78%)          | 4 (100%)           |
| Medical history, no. (%)                        |                      |                  |                    |
| Pulmonary disease                               | 5 (38%)              | 3 (33%)          | 2 (50%)            |
| Cardiovascular disease                          | 3 (23%)              | 2 (22%)          | 1 (25%)            |
| Hypertension                                    | 4 (31%)              | 2 (22%)          | 2 (50%)            |
| Diabetes                                        | 1 (8%)               | 0 (0%)           | 1 (25%)            |
| Cancer                                          | 3 (23%)              | 3 (33%)          | 0 (0%)             |
| Chronic kidney disease                          | 3 (23%)              | 1 (11%)          | 2 (50%)            |
| Vital signs                                     |                      |                  |                    |
| Saturation, %                                   | 95.0 (94.5-97.0)     | 95.0 (95.0-97.5) | 94.5 (93.3-95.8)   |
| Oxygen therapy, L/min                           | 2 (0-3)              | 2 (0-3)          | 1.5 (0-5.3)        |
| Respiratory rate, /min                          | 18 (16-25)           | 19 (17-26)       | 17 (15-21)         |
| Pulse, /min                                     | 79.0 (67.5-96.5)     | 77.0 (63.5-96.5) | 92.5 (78.5-105.8)  |
| Systolic blood pressure, mmHg                   | 139 (120-146)        | 139 (122-146)    | 130 (114-163)      |
| Diastolic blood pressure, mmHg                  | 77 (72-85)           | 77 (72-85)       | 79 (70-87)         |
| Symptoms, no. (%)                               |                      |                  |                    |
| Fever                                           | 8 (61.5)             | 6 (66.7)         | 2 (50)             |
| Dyspnea                                         | 7 (53.8)             | 4 (44.4)         | 3 (75)             |
| Cough                                           | 10 (76.9)            | 8 (88.9)         | 2 (50)             |
| Myalgia                                         | 2 (15.4)             | 2 (22.2)         | 0 (0)              |
| Diarrhea                                        | 1 (7.7)              | 1 (11.1)         | 0 (0)              |
| CT-thorax severity score                        | 11 (8-13)            | 8 (7-13)         | 12 (11-12)         |
| <b>Characteristics at day five of admission</b> |                      |                  |                    |
| Admitted at ICU, no. (%)                        | <b>n=7</b>           | <b>n=3</b>       | <b>n=4</b>         |
| Requires oxygen therapy, no. (%)                | 2 (29%)              | 0 (0%)           | 2 (50%)            |
|                                                 | 4 (57%)              | 1 (33%)          | 3 (75%)            |

**Supplementary Table 2: Whole blood and isolated PBMCs cell count of COVID-19 patients at presentation**

and five days after admission as measured using a sysmex XN-450 automated hematology analyzer. Data is the median (inter quartile range) or percentage (%). Related to Figure 1.

| Characteristics                         | All patients<br>N=13 | Outcome             |                     |
|-----------------------------------------|----------------------|---------------------|---------------------|
|                                         |                      | Recovered<br>N=9    | ICU / Death<br>N=4  |
| Whole blood at presentation             |                      |                     |                     |
| White blood cells (10 <sup>3</sup> /uL) | 5.47 (4.04-7.81)     | 5.47 (4.28-7.52)    | 5.83 (3.98-9.15)    |
| Neutrophils (%)                         | 78.60 (60.25-84.55)  | 77.90 (60.25-84.55) | 82.55 (62.00-89.90) |
| Lymphocytes (%)                         | 12.70 (8.75-28.20)   | 13.90 (9.20-32.05)  | 10.90 (5.95-18.93)  |
| Monocytes (%)                           | 6.50 (4.00-10.85)    | 6.50 (4.90-10.60)   | 6.20 (2.98-11.83)   |
| Eosinophils (%)                         | 0.00 (0.00-0.50)     | 0.30 (0.00-0.50)    | 0.00 (0.00-7.65)    |
| Basophils (%)                           | 0.30 (0.20-0.45)     | 0.30 (0.20-0.40)    | 0.40 (0.23-0.50)    |
| PBMC at presentation                    |                      |                     |                     |
| White blood cells (10 <sup>3</sup> /uL) | 3.32 (2.58-6.43)     | 3.36 (3.06-9.02)    | 2.44 (1.83-4.14)    |
| Neutrophils (%)                         | 11.10 (5.70-17.05)   | 9.80 (4.55-21.30)   | 11.30 (7.50-19.00)  |
| Lymphocytes (%)                         | 62.30 (45.50-69.60)  | 62.30 (42.25-73.05) | 59.25 (46.78-70.00) |
| Monocytes (%)                           | 25.30 (19.55-38.70)  | 24.50 (19.55-40.15) | 26.25 (19.08-38.75) |
| Eosinophils (%)                         | 0.00 (0.00-0.00)     | 0.00 (0.00-0.00)    | 0.00 (0.00-0.00)    |
| Basophils (%)                           | 0.50 (0.30-0.75)     | 0.40 (0.30-0.70)    | 0.60 (0.50-1.00)    |
| Whole blood five days after admission   |                      |                     |                     |
| White blood cells (10 <sup>3</sup> /uL) | 9.34 (4.90-11.06)    | 7.92 (4.48-13.45)   | 9.48 (5.61-11.06)   |
| Neutrophils (%)                         | 6.75 (3.85-14.48)    | 13.65 (5.78-15.53)  | 4.40 (3.03-7.88)    |
| Lymphocytes (%)                         | 7.30 (4.45-10.50)    | 9.55 (7.10-13.35)   | 5.00 (3.38-7.38)    |
| Monocytes (%)                           | 1.10 (0.15-1.90)     | 1.10 (0.70-1.88)    | 0.65 (0.00-3.33)    |
| Eosinophils (%)                         | 0.25 (0.13-0.30)     | 0.25 (0.20-0.30)    | 0.20 (0.03-0.38)    |
| Basophils (%)                           | 0.12 (0.03-0.21)     | 0.15 (0.03-0.63)    | 0.12 (0.04-0.16)    |
| PBMC five days after admission          |                      |                     |                     |
| White blood cells (10 <sup>3</sup> /uL) | 2.27 (2.01-3.39)     | 2.27 (2.10-3.35)    | 2.64 (1.03-3.39)    |
| Neutrophils (%)                         | 17.50 (8.58-22.48)   | 8.65 (7.60-34.53)   | 19.75 (16.50-22.48) |
| Lymphocytes (%)                         | 52.95 (31.50-59.43)  | 47.85 (31.50-63.30) | 57.65 (31.05-59.43) |
| Monocytes (%)                           | 27.10 (23.60-44.08)  | 35.15 (26.00-44.08) | 23.70 (20.13-46.03) |
| Eosinophils (%)                         | 0.00 (0.00-0.00)     | 0.00 (0.00-0.00)    | 0.00 (0.00-0.00)    |
| Basophils (%)                           | 0.55 (0.12-1.28)     | 0.21 (0.01-0.48)    | 1.15 (0.68-1.48)    |

**Supplementary Table 3:** Genes displayed in heatmap of **Figure 2H**. Related to Figure 2.

| Gene symbol | log2 fold change * | p-value  |
|-------------|--------------------|----------|
| TREML4      | -9.33709           | 2.14E-05 |
| MIR7641-2   | -2.47005           | 0.002589 |
| LPCAT1      | 2.031801           | 3.97E-05 |
| IL10        | 1.065163           | 0.001814 |
| LINC00689   | 3.739978           | 0.002125 |
| SLC51A      | 2.099609           | 0.004202 |
| ADGRG3      | 1.673412           | 0.004231 |
| ZDHHC19     | 2.823089           | 4.48E-06 |
| MICB        | 2.585685           | 0.001359 |
| LRG1        | 1.16365            | 0.000604 |
| ANKDD1B     | 1.32709            | 0.002124 |
| PIK3CD-AS1  | 0.88995            | 0.000178 |
| IL1RN       | 0.809709           | 0.002971 |
| IFIT1B      | 2.881311           | 0.003805 |
| DDX60L      | 1.139357           | 0.001651 |
| CBWD6       | 1.173252           | 0.000214 |
| RBM43       | 0.970275           | 0.002312 |
| WFDC21P     | 4.05669            | 0.000487 |
| SYNPO2      | 1.670912           | 0.003177 |
| SOBP        | 3.295889           | 0.001449 |
| SUMO1P1     | 1.456744           | 0.000496 |
| MGAT4A      | 0.789025           | 0.004923 |
| KLRC2       | 2.1165             | 0.000793 |
| AKAP5       | 2.440379           | 0.000192 |
| CD72        | 1.394303           | 0.001677 |
| PLAC8       | 1.464798           | 0.003344 |
| SLC30A4     | 1.605307           | 0.004426 |
| PNPT1       | 1.134624           | 0.004084 |
| SH2D1B      | 1.823213           | 0.00027  |
| IL18RAP     | 1.812693           | 0.000811 |
| SLC35E2     | -1.27329           | 3.08E-05 |
| HM13        | -0.48393           | 0.002582 |
| GPR135      | -1.3297            | 0.001644 |
| LUC7L       | -1.24367           | 0.001195 |
| VDR         | -1.57407           | 0.003439 |
| TFAMP1      | -4.7875            | 0.000228 |
| TCEA2       | -1.02761           | 0.003184 |
| DNAJC7      | -1.1878            | 0.002619 |
| AVPI1       | -0.90545           | 0.002113 |
| PDXP        | -0.84361           | 0.004749 |
| CHEK1       | -4.63781           | 0.000666 |
| MBNL2       | -1.80341           | 0.001966 |
| CCDC86      | -0.63525           | 0.003946 |

|              |          |          |
|--------------|----------|----------|
| LOC100288152 | -1.24735 | 0.000864 |
| C1orf53      | -1.97481 | 0.001537 |
| ZNF668       | -0.87961 | 0.000801 |
| PANO1        | -1.73433 | 0.002827 |
| ANKDD1A      | -1.03553 | 0.000492 |
| ZBTB46       | -1.06592 | 0.004639 |
| RAD54L       | -2.06287 | 0.003253 |
| TONSL        | -1.19694 | 0.002862 |
| ROR2         | -3.37008 | 0.002996 |
| PIEZO2       | -3.08025 | 0.002626 |
| FZD7         | -2.06404 | 0.00484  |
| LOC100335030 | -1.59151 | 0.000198 |
| FANCA        | -3.45732 | 0.001465 |
| DNAH8        | -2.72094 | 0.002291 |
| CCNE1        | -1.98496 | 0.001138 |
| TK1          | -1.7106  | 0.00409  |
| HIST1H4A     | -1.45902 | 0.000525 |
| NOV          | -3.80808 | 0.004211 |
| SERPINB10    | 2.117877 | 0.001043 |
| DDAH2        | 2.71082  | 0.004007 |
| ADAMTS1      | 3.271828 | 1.06E-05 |
| MS4A3        | 2.537861 | 0.001049 |
| BPI          | 1.412597 | 0.001116 |
| KLHL14       | -3.15371 | 0.004334 |
| CD27         | -2.16616 | 0.003735 |
| CCR10        | -2.84861 | 0.001859 |
| NUGGC        | -2.09155 | 0.004026 |
| HIST1H3G     | -2.07989 | 0.003958 |
| CDC20        | -2.04678 | 0.003868 |
| ZBTB32       | -2.46777 | 0.002884 |
| MYO1D        | -2.4475  | 0.000606 |
| GPRC5D       | -3.17541 | 0.003406 |
| TXNDC5       | -2.50757 | 0.001479 |
| RAPGEF5      | -3.40663 | 0.00215  |
| ANKRD36BP2   | -2.24412 | 0.000637 |
| GSG2         | -2.04423 | 0.003735 |
| HIST1H3B     | -1.82588 | 0.002808 |
| UCHL1        | -2.96166 | 0.001272 |
| PARM1        | -2.0716  | 0.002834 |
| CFAP54       | -2.46088 | 0.003075 |
| FER1L4       | -4.27014 | 0.000583 |
| IGLL5        | -3.69963 | 0.000436 |
| HID1         | -3.06147 | 0.0003   |
| TNFRSF13B    | -2.98009 | 0.002759 |
| GLDC         | -3.29366 | 0.003695 |
| JCHAIN       | -2.18465 | 0.004266 |

|        |          |          |
|--------|----------|----------|
| LENG8  | -3.51839 | 0.000504 |
| SLC4A1 | 6.865651 | 0.002709 |
| HBB    | 5.731114 | 3.29E-05 |
| HBA2   | 7.043197 | 9.2E-06  |

\* Log2 fold change: Difference between mean log2 fold change of gene expression in COVID-19 patients who recovered versus patients who required ICU admission or died.

Genes are listed in same order as shown in heatmap (**Figure 2H**) from top to bottom.

**Supplementary Table 4:** Genes displayed in heatmap of **Figure 3H**. Related to Figure 3.

| Gene symbol | Log2 fold change | p-value  |
|-------------|------------------|----------|
| TREML4      | -7.04571         | 6.61E-26 |
| ADAMTS5     | -3.74279         | 5.07E-07 |
| CTTNBP2     | -8.10413         | 3.91E-10 |
| DUSP2       | -2.68855         | 6.27E-05 |
| CD1C        | -2.17054         | 1.39E-06 |
| ZNF703      | -2.19917         | 0.000297 |
| BFAR        | -1.96088         | 0.000993 |
| CCDC122     | -2.04642         | 0.000635 |
| HLA-DPB2    | -2.39417         | 1.75E-06 |
| ADGRE3      | -2.90594         | 0.000351 |
| HLA-DOA     | -5.59538         | 0.000162 |
| FAM167A     | -3.67792         | 0.000476 |
| HLA-DMA     | -7.09137         | 1.99E-06 |
| KNDC1       | -2.74683         | 0.000952 |
| RTN1        | -1.86463         | 2.35E-06 |
| ADGRD1      | -1.53986         | 0.000826 |
| HNMT        | -1.31252         | 0.000553 |
| TMEM86A     | -1.23842         | 0.000431 |
| OXGR1       | -5.30736         | 2.54E-05 |
| CACNA2D3    | -1.90249         | 5.75E-06 |
| CAMK1D      | -2.19223         | 2.6E-13  |
| C3          | -2.19134         | 6.78E-09 |
| CX3CR1      | -1.77926         | 0.000325 |
| HLA-DRA     | -1.33564         | 0.000138 |
| PAQR7       | -1.15699         | 0.000558 |
| ABCA9       | -3.35174         | 0.000139 |
| SLC35E2     | -1.38076         | 2.77E-05 |
| MB21D2      | -1.42501         | 0.000519 |
| SH3BP4      | -1.75409         | 5.51E-07 |
| KCNC3       | -1.27091         | 0.000306 |
| TSPYL5      | -1.90701         | 0.000585 |
| TBC1D9      | -1.05018         | 0.000775 |
| CD74        | -1.02395         | 0.000459 |
| ZBTB46      | -1.48894         | 0.000428 |
| ZNF395      | -1.02917         | 0.00012  |
| RPS3A       | -0.84285         | 0.000972 |
| LINC00936   | -0.96803         | 0.000407 |
| RAPH1       | -1.40872         | 0.000812 |
| IER2        | -1.30069         | 0.000484 |
| IL1R2       | 4.583973         | 8.03E-06 |
| GLDN        | 4.462276         | 1.51E-05 |
| IFITM1      | 2.736501         | 0.000328 |
| ISG15       | 2.719541         | 0.000243 |



|              |          |          |
|--------------|----------|----------|
| ANKRD45      | 5.380558 | 2.03E-06 |
| NRIR         | 3.406254 | 6.13E-05 |
| SIGLEC1      | 4.386509 | 0.000567 |
| SLCO4A1      | 2.53741  | 3.47E-05 |
| TIMP4        | 5.849213 | 0.00023  |
| MFGE8        | 2.722993 | 0.000958 |
| IL1R2        | 4.684606 | 0.000306 |
| SRGAP1       | 2.70742  | 0.000141 |
| ABTB2        | 2.189041 | 0.000859 |
| NKD1         | 5.183029 | 0.000208 |
| ANKRD22      | 2.060797 | 0.000151 |
| TNFAIP6      | 1.670038 | 0.000728 |
| TMEM45A      | 2.498901 | 0.000374 |
| FMN1         | 1.769936 | 0.000023 |
| ZNF608       | 1.484828 | 0.000615 |
| LOC101927272 | 4.220622 | 0.00094  |
| FRRS1        | 1.039967 | 5.66E-05 |
| LINC01410    | 1.039229 | 9.71E-05 |
| TMEM144      | 1.170582 | 4.04E-05 |
| HIST1H2BD    | 1.422863 | 0.000344 |
| P2RY1        | 1.057839 | 0.00018  |
| LHFP         | 1.958464 | 0.000177 |
| ADCY3        | 1.923302 | 2.33E-07 |
| ASPH         | 1.658725 | 0.000786 |
| THBS1        | 1.723182 | 0.000248 |
| SOCS1        | 1.673436 | 0.000796 |
| SSC4D        | 3.168443 | 6.62E-06 |
| C3AR1        | 1.445453 | 0.000217 |
| CREB3L1      | 7.571913 | 7.18E-07 |
| TGM2         | 2.289047 | 0.000316 |
| XK           | 2.412617 | 0.000266 |

\* Log2 fold change: Difference between mean log2 fold change of gene expression in COVID-19 patients who recovered versus patients who required ICU admission or died.

Genes are listed in same order as shown in heatmap (**Figure 3H**) from top to bottom.
